# Supplementary material for: Challenges of soil carbon sequestration in NENA Region
Source: Copernicus journal article supplement (doi:10.5194/soil-2017-39), 2018-01-12
Supplement: Supplementary file [file soil-2017-39-AC3-supplement.pdf]

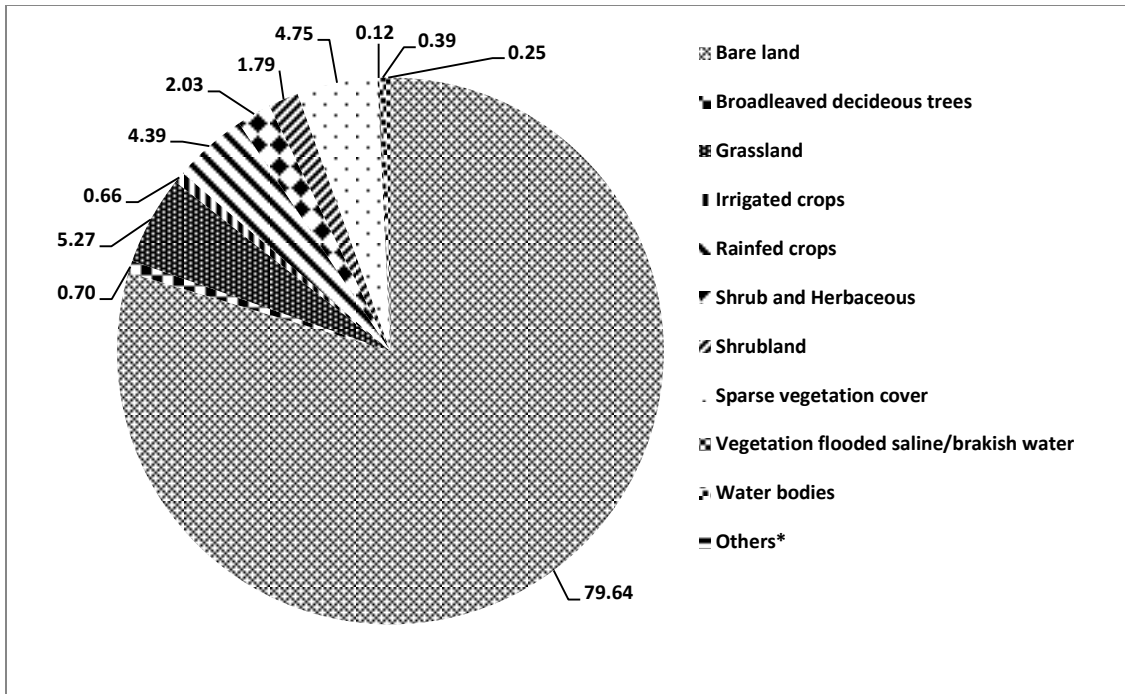

\*Others: Mixed trees, Neadleaved evergreen trees and Urban

Figure 4a. Proportion of main land cover and land use in NENA region (Source: ESA, 2015)

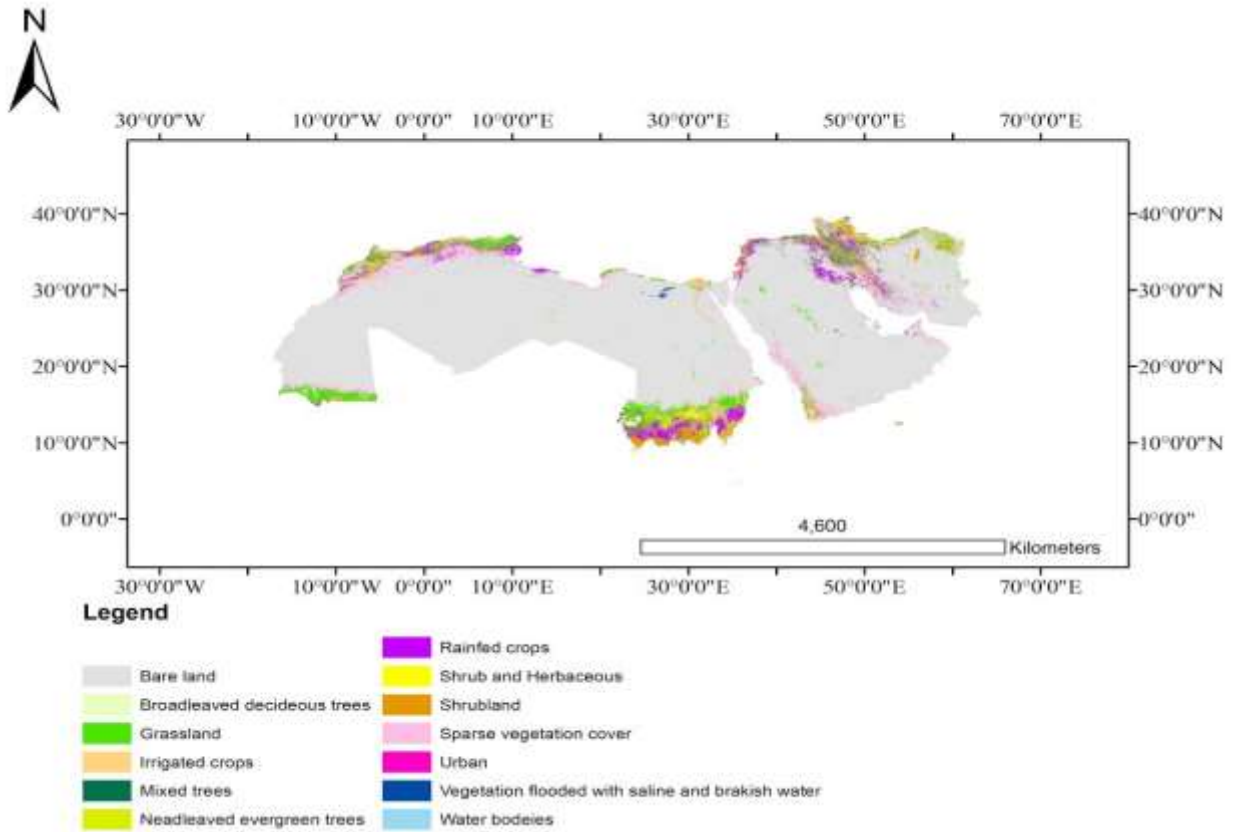

Figure 4b. Land cover map of NENA region (Source: ESA, 2015)

<http://maps.elie.ucl.ac.be/CCI/viewer/index.php>
